# Supplementary material
Source: PubMed Central journal article supplement (PMC4558651)
Supplement: supp_tpc.114.132274_tpc132274_Supplemental.pdf [file supp_tpc.114.132274_tpc132274_Supplemental.pdf]

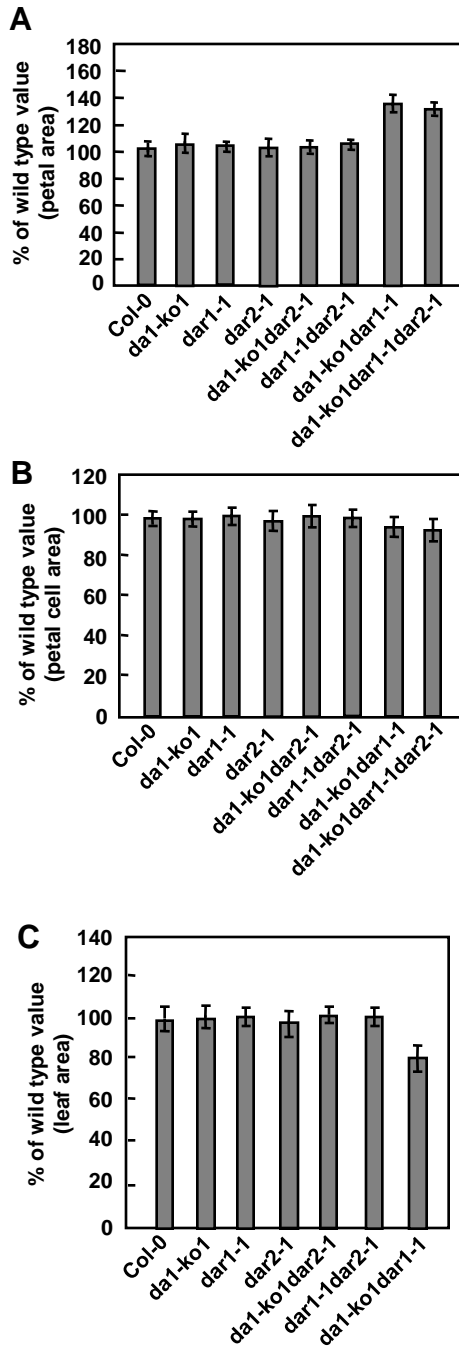

**Supplemental Figure 1. *DA1*, *DAR1* and *DAR2* act redundantly to affect organ growth.**

Petal area (A), petal cell area (B) and fifth leaf area (C) of Col-0, *da1-ko1*, *dar1-1*, *dar2-1*, *da1-ko1 dar2-1*, *da1-ko1 dar1-1* and *da1-ko1 dar1-1 dar2-1*.

Values (A-C) are given as mean  $\pm$  SE relative to the respective wild-type values, set at 100%.

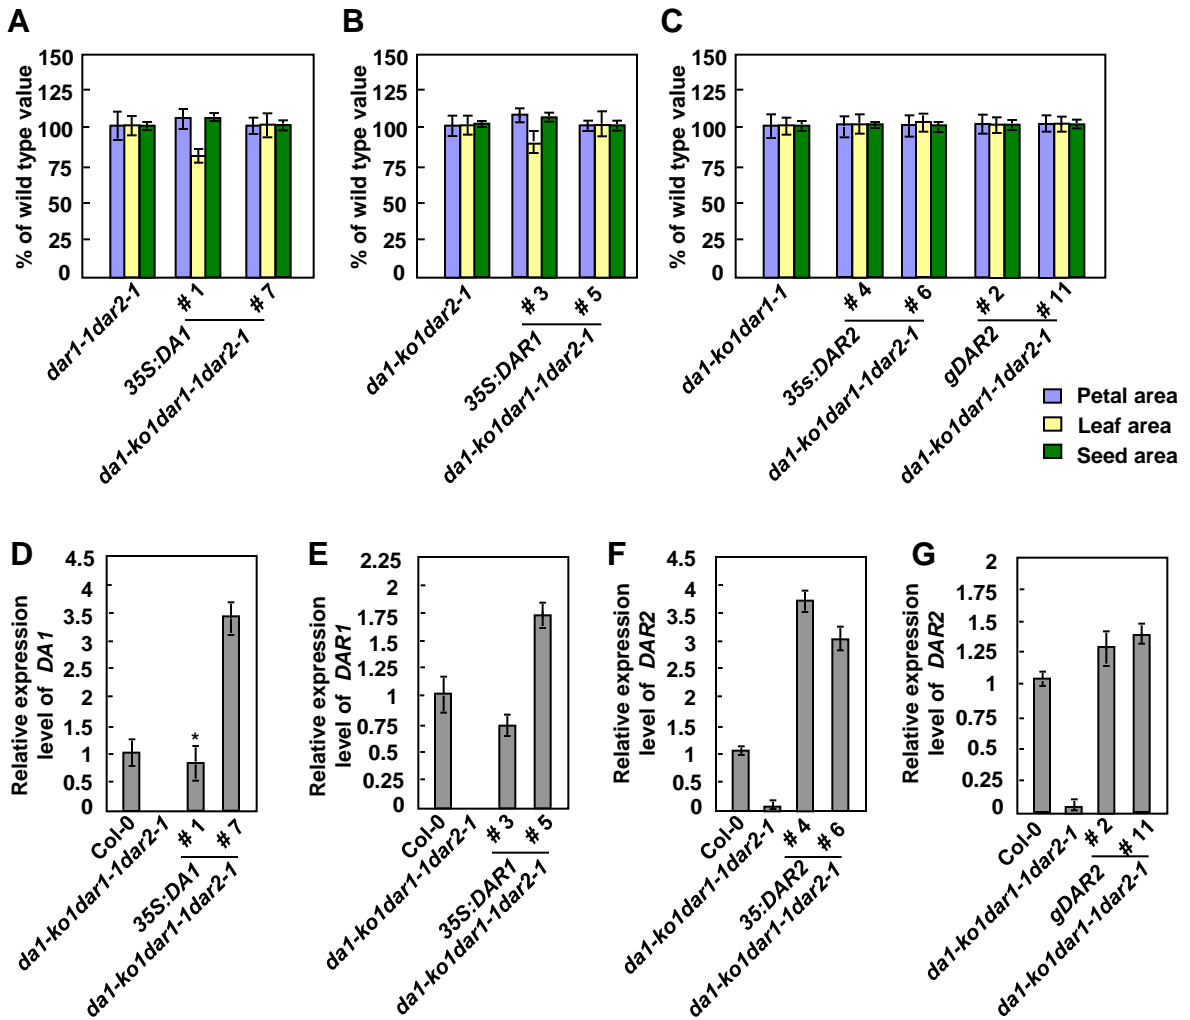

### Supplemental Figure 2 . Complementation test of *da1-ko1 dar1-1 dar2-1*.

(A) Petal area, fifth leaf area and seed area of *dar1-1 dar2-1* and *35S:DA1; da1-ko1 dar1-1 dar2-1* plants. Values are given as mean  $\pm$  SE relative to *dar1-1 dar2-1* values, set at 100%.

(B) Petal area, fifth leaf area and seed area of *da1-ko1 dar2-1* and *35S:DAR1; da1-ko1 dar1-1 dar2-1* plants. Values are given as mean  $\pm$  SE relative to *da1-ko1 dar2-1* values, set at 100%.

(C) Petal area, fifth leaf area and seed area of *da1-ko1 dar1-1*, *35S:DAR2; da1-ko1 dar1-1 dar2-1* and *gDAR2; da1-ko1 dar1-1 dar2-1* plants. *gDAR2; da1-ko1 dar1-1 dar2-1* is *da1-ko1 dar1-1 dar2-1* transformed with a genomic copy of *DAR2*. Values are given as mean  $\pm$  SE relative to *da1-ko1 dar1-1* values, set at 100%.

(D) Relative expression level of *DA1* in Col-0, *da1-ko1 dar1-1 dar2-1* and *35S:DA1; da1-ko1 dar1-1 dar2-1* plants. Data shown are mean  $\pm$  SD of three replicates.

(E) Relative expression level of *DAR1* in Col-0, *da1-ko1 dar1-1 dar2-1* and *35S:DAR1; da1-ko1 dar1-1 dar2-1* plants. Data shown are mean  $\pm$  SD of three replicates.

(F) Relative expression level of *DAR2* in Col-0, *da1-ko1 dar1-1 dar2-1* and *35S:DAR2; da1-ko1 dar1-1 dar2-1* plants. Data shown are mean  $\pm$  SD of three replicates.

(G) Relative expression level of *DAR2* in Col-0, *da1-ko1 dar1-1 dar2-1* and *gDAR2; da1-ko1 dar1-1 dar2-1* plants. *gDAR2; da1-ko1 dar1-1 dar2-1* is *da1-ko1 dar1-1 dar2-1* transformed with a genomic copy of *DAR2*. Data shown are mean  $\pm$  SD of three replicates.

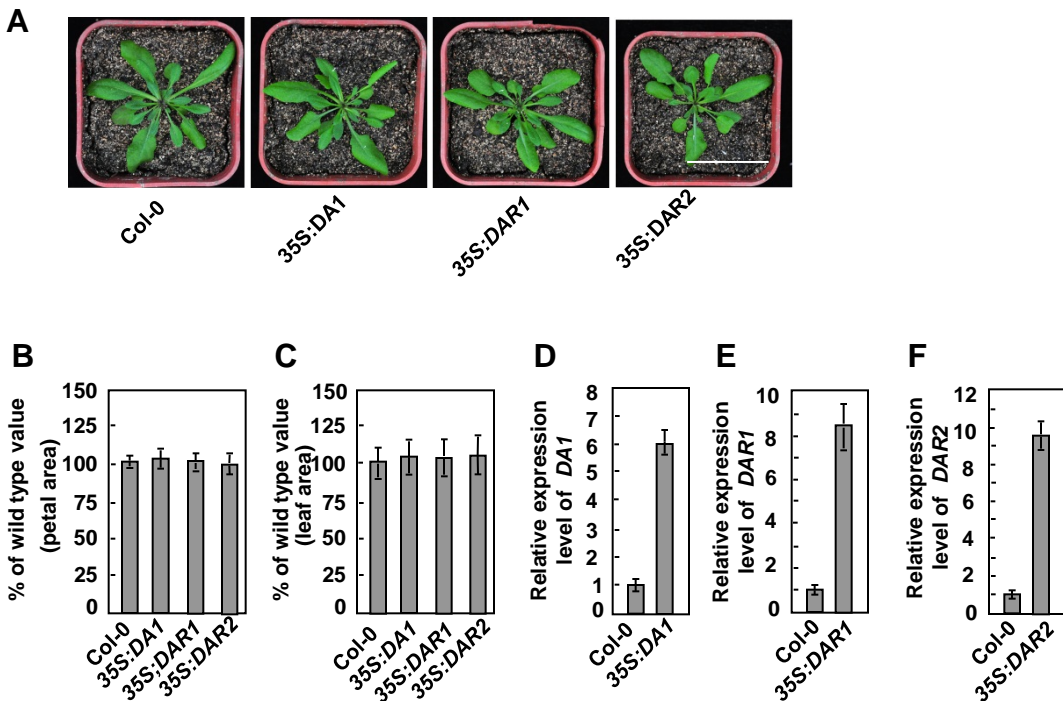

**Supplemental Figure 3 . Overexpression of *DA1*, *DAR1* or *DAR2* does not affect organ size.**

(A) 30-d-old plants of Col-0, 35S:*DA1*, 35S:*DAR1* and 35S:*DAR2*.

(B) Petal area of Col-0, 35S:*DA1*, 35S:*DAR1* and 35S:*DAR2*. Values are given as mean  $\pm$  SE relative to wild-type values.

(C) Fifth leaf area of Col-0, 35S:*DA1*, 35S:*DAR1* and 35S:*DAR2*. Values are given as mean  $\pm$  SE relative to wild-type values.

(D) Relative expression level of *DA1* in Col-0 and 35S:*DA1* plants. Data shown are mean  $\pm$  SD of three replicates.

(E) Relative expression level of *DAR1* in Col-0 and 35S:*DAR1* plants. Data shown are mean  $\pm$  SD of three replicates.

(F) Relative expression level of *DAR2* in Col-0 and 35S:*DAR2* plants. Data shown are mean  $\pm$  SD of three replicates.

Bar= 5cm in (A)

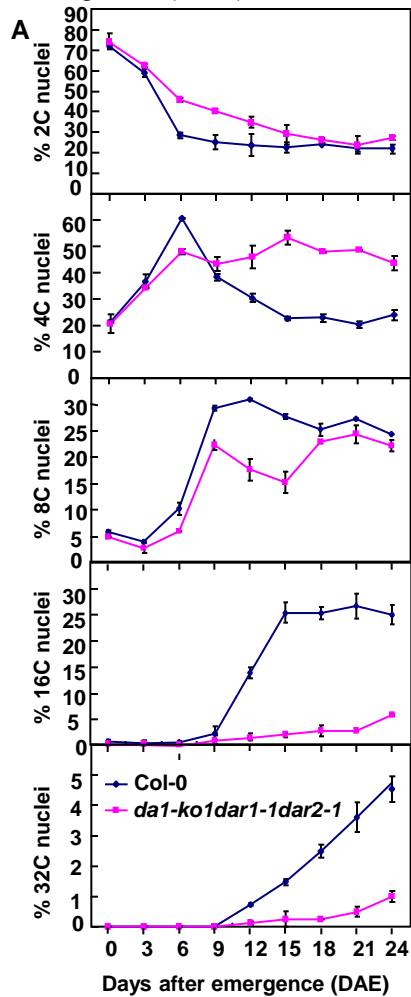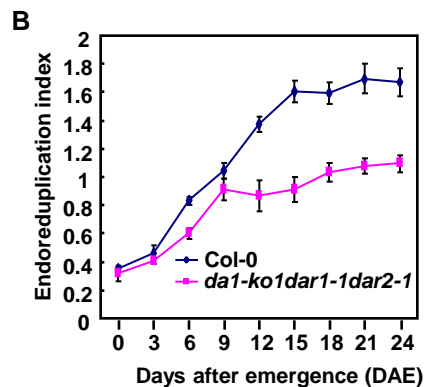

**Supplemental Figure 4. *DA1*, *DAR1* and *DAR2* act redundantly to influence endoreduplication during leaf development.**

(A) Nuclear DNA ploidy distribution of Col-0 and *da1-ko1 dar1-1 dar2-1* fifth leaves measured over a period of 24 days after emergence (DAE). At 0 DAE, the fifth leaves ( $\sim 0.5$  mm<sup>2</sup>) were visible. The values represent averages of three independent biological replicates.

(B) The endoreduplication index (EI) of Col-0 and *da1-ko1dar1-1dar2-1* fifth leaves. The EI represents the average number of endocycles undergone by a given nucleus.

Values (A and B) are given as mean  $\pm$  SE.

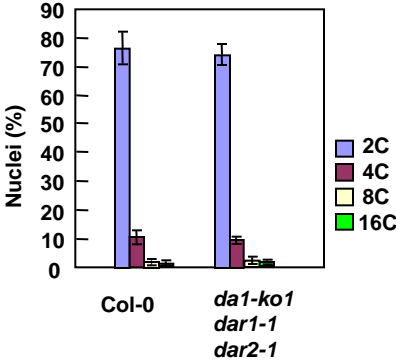

**Supplemental Figure 5. *da1-ko1 dar1-1 dar2-1* is not altered in endoreduplication in petal cells**

Nuclear DNA ploidy distribution of Col-0 and *da1-ko1 dar1-1 dar2-1* petals. Values are given as mean  $\pm$  SE.

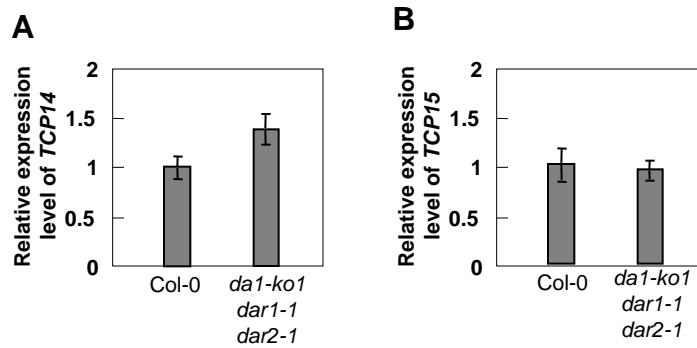

**Supplemental Figure 6. Expression of *TCP14* and *TCP15* in Col-0 and *da1-ko1 dar1-1 dar2-1* leaves.**

(A) Expression of *TCP14* in Col-0 and *da1-ko1 dar1-1 dar2-1* leaves.

(B) Expression of *TCP15* in Col-0 and *da1-ko1 dar1-1 dar2-1* leaves.

The values represent averages of three independent biological replicates.

Values (A and B) are given as mean  $\pm$  SE.

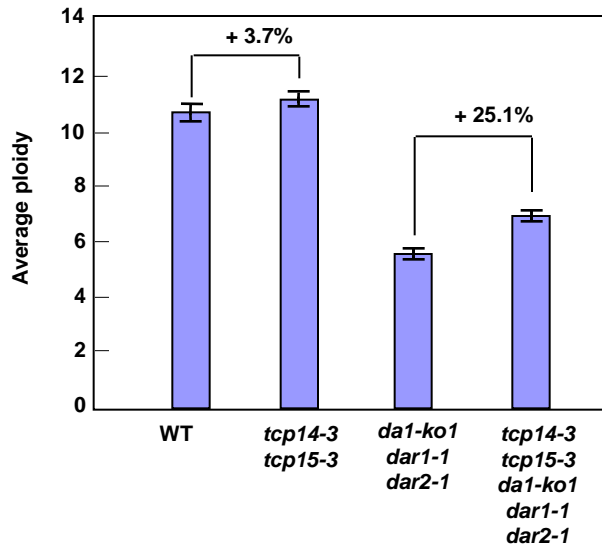

**Supplemental Figure 7. *tcp14-3 tcp15-3* partially suppresses the reduced ploidy level phenotype of *da1-ko1 dar1-1 dar2-1*.**

The average ploidy level of nuclei in Col-0, *tcp14-3 tcp15-3*, *da1-ko1 dar1-1 dar2-1* and *tcp14-3 tcp15-3 da1-ko1 dar1-1 dar2-1* fifth leaves. Values are given as mean ± SE.

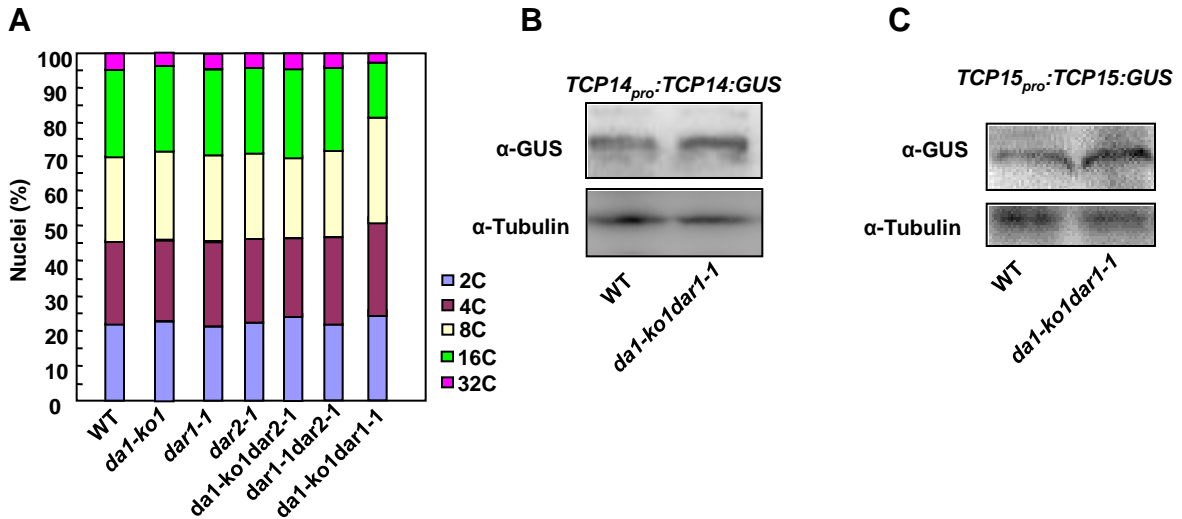

**Supplemental Figure 8. DA1, DAR1 and DAR2 redundantly affect endoreduplication.**

(A) Nuclear DNA ploidy distribution of Co-0, *da1-ko1*, *dar1-1*, *dar2-1*, *da1-ko1 dar2-1*, *dar1-1 dar2-1* and *da1-ko1 dar1-1* fifth leaves.

(B) The TCP14-GUS protein levels in *TCP14<sub>pro</sub>:TCP14-GUS* and *TCP14<sub>pro</sub>:TCP14-GUS;da1-ko1 dar1-1* plants. Total protein extracts were subjected to immunoblot assays using anti-GUS and anti-Tubulin (as loading control) antibodies.

(C) The TCP15-GUS protein levels in *TCP15<sub>pro</sub>:TCP15-GUS* and *TCP15<sub>pro</sub>:TCP15-GUS;da1-ko1 dar1-1* plants. Total protein extracts were subjected to immunoblot assays using anti-GUS and anti-Tubulin (as loading control) antibodies.



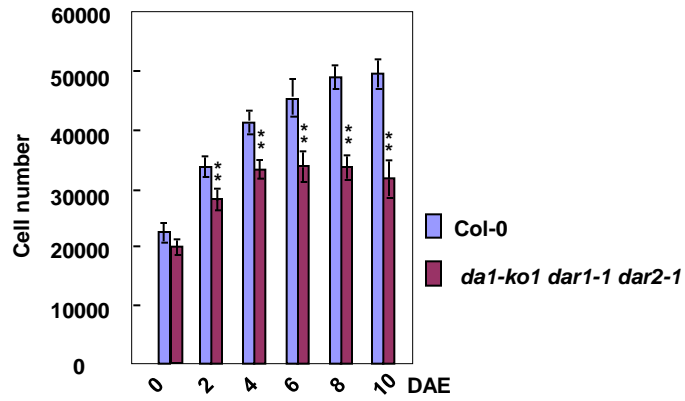

**Supplemental Figure 9. The simultaneous disruption of *DA1*, *DAR1* and *DAR2* affects cell proliferation.**

The average number of cells in Col-0 and *da1-ko1 dar1-1 dar2-1* fifth leaves measured over a period of 10 days after emergence (DAE).

Values are given as mean  $\pm$  SE. \*\*,  $P < 0.01$  compared with the wild type (Student's *t*-test).

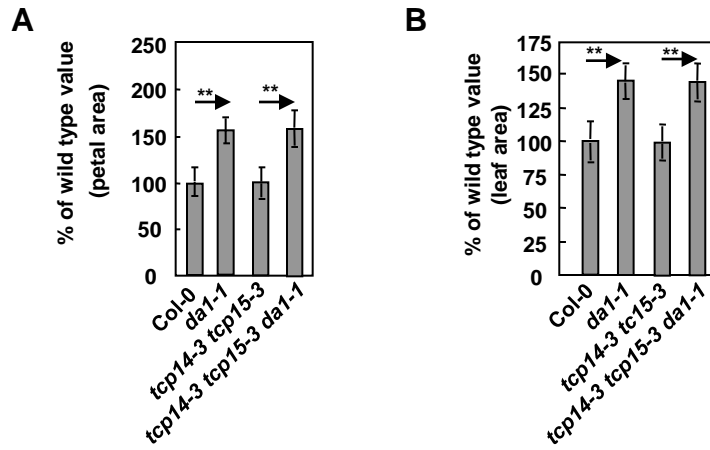

**Supplemental Figure 10. *tcp14-3 tcp15-3* does not suppress the petal and leaf size phenotypes of *da1-1*.**

(A) Petal area of Col-0, *da1-1*, *tcp14-3 tcp15-3* and *tcp14-3 tcp15-3 da1-1*.

(B) Fifth leaf area of Col-0, *da1-1*, *tcp14-3 tcp15-3* and *tcp14-3 tcp15-3 da1-1*.

Values (A and B) are given as mean  $\pm$  SE relative to the respective wild-type values, set at 100%. \*\*,  $P < 0.01$  compared with the wild type (Student's *t*-test).

**Supplemental Table 1. Complementation test of *da1-ko1 dar1-1 dar2-1*.**

| Constructs      | Number of complemented plants | Number of no complemented plants |
|-----------------|-------------------------------|----------------------------------|
| <i>35S:DAI</i>  | 21                            | 1                                |
| <i>35S:DAR1</i> | 30                            | 2                                |
| <i>35s:DAR2</i> | 28                            | 1                                |
| <i>gDAR2</i>    | 25                            | 0                                |

**Supplemental Table 2. List of primers used in this study**

| Name                                                     | Primers                            |
|----------------------------------------------------------|------------------------------------|
| <b>Primers for verifying T-DNA</b>                       |                                    |
| SALK_126092-LP                                           | AAGCCAGCTAAATATGATTGG              |
| SALK_126092-RP                                           | AATCCGTTTGGAACCTCGTTTG             |
| SALK_067100-LP                                           | ATTTAGTCGAAGCCATGCATG              |
| SALK_067100-RP                                           | TTACAAGGAGCAGCATCATCC              |
| SALK_016122LP                                            | TTTCATTCCACCTTATGAGCCT             |
| SALK_016122RP                                            | ATCTCCAAGCAACAAATATCCC             |
| SM_3_19812-LP                                            | TTCAGCTAACGCGAGAGCTAG              |
| SM_3_19812-RP                                            | CTTGCTGATCCTCCTCATCAC              |
| SALK_011491-LP                                           | AGAACCACGTAAGCCCATCTC              |
| SALK_011491-RP                                           | TCAAATGAACTCCACTACCGC              |
| SALK_LBa1                                                | TGGTTCACGTAGTGGGCCATCG             |
| SAIL_LB1                                                 | GCCTTTTCAGAAATGGATAAATAGCCTTGCTTCC |
| <b>Primers for constructs in yeast two hybrid assays</b> |                                    |
| DA1-LIM+C- <i>Sall</i> -LP                               | GTCGACCGGTGGTTTAAACAAGATCTTT       |
| DA1-LIM+C- <i>NotI</i> -RP                               | GCGGCCGCTTAAACCGGAATCTACCGGTC      |
| DAR1- <i>Sall</i> -LP                                    | GTCGACCGGGTGGCTAACTAAAATCCTTA      |
| DAR1- <i>NotI</i> -RP                                    | GCGGCCGCTTAAAGAAATGTACCGGTCAAGCGA  |
| DAR2- <i>Sall</i> -LP                                    | GTCGACCATGGATTCTTCTCTCTTTC         |
| DAR2- <i>NotI</i> -RP                                    | GCGGCCGCCAAAGGAAAAGTTCCAGTTA       |
| TCP14- <i>EcoRI</i> -LP                                  | GAATTCAAAAGCCAACATCAAGTATCT        |
| TCP14- <i>NotI</i> -RP                                   | GCGGCCGCTAATCTTGCTGATCCTCCTCATCA   |
| TCP15- <i>EcoRI</i> -LP                                  | GAATTCGATCCGGATCCGGATCAT           |
| TCP15- <i>NotI</i> -RP                                   | GCGGCCGCTTAGGAATGATGACTGGTGCTTCC   |
| <b>Primers for constructs in pull-down assays</b>        |                                    |
| GST-DA1-F                                                | GGATCCATGGGTGGTTTAAACAAGAT         |
| GST-DA1-R                                                | GCGGCCGCTTAAACCGGAATCTACCGGTC      |
| GST-DAR1-F                                               | GGATCCATGGGTGGCTAACTAAAATCCT       |

---

|                                    |                                        |
|------------------------------------|----------------------------------------|
| GST-DAR1-R                         | CTCGAGTTAAGGAAATGTACCGGTCAAGC          |
| GST-DAR2-F                         | GGATCCATGGATTCTTCTCCTCTTC              |
| GST-DAR2-R                         | CTCGAGTCACAAAGGAAAAGTCCAG              |
| TCP14-pMAL-C2- <i>EcoRI</i> -LP    | GAATTCACAAAAGCCAACATCAAGTATCTTAAAT     |
| TCP14- pMAL-C2- <i>HindIII</i> -RP | AAGCTTGCCATAATCTTGCTGATCCTCCTCATCACCAC |
| TCP15- pMAL-C2- <i>EcoRI</i> -LP   | GAATTCGATCCGGATCCGGATCATAACCATC        |
| TCP15- pMAL-C2- <i>HindIII</i> -RP | AAGCTTGCCTAGGAATGATGACTGGTGCTTCCATCT   |

#### Primers for constructs in ubiquitin binding assays

|                    |                                   |
|--------------------|-----------------------------------|
| GST-DAR1-UIMs-F    | GGATCCGTAGAAGATAGAACTTGGAAGGTCC   |
| GST-DAR1-UIMs-R    | CTCGAGTGGAATGAGGAAGGGATATGGTT     |
| GST-DAR1-delUIMs-F | GGATCTTTGACAAGTATGAATGTGGGATCTCC  |
| GST-DAR1-delUIMs-R | CTCGAGTCATACTTGTCAAAATCAGATCCTTCC |
| GST-DAR1-F         | GGATCCATGGGGTGGCTAACTAAAATCCT     |
| GST-DAR1-R         | CTCGAGTTAAGGAAATGTACCGGTCAAGC     |
| GST-DAR2-UIMs-F    | GGATCCAAGGTCCTTCTCTACCTCCTT       |
| GST-DAR2-UIMs-R    | CTCGAGACCGCCACATATTCTTTGTCT       |

#### Primers for constructs in Co-IP assays

|                    |                                 |
|--------------------|---------------------------------|
| DA1-MYC-FP         | GGTACCCGGTTGGTTTAAACAAGATCTTT   |
| DA1-MYC-RP         | GGATCCTTAAACCGGGAATCTACCGGTC    |
| DAR1-MYC-FP        | GGATCCTAGGGTGGCTAACTAAAATCCT    |
| DAR1-MYC-RP        | ACTAGTTTTAAGGAAATGTACCGGTCAAG   |
| DAR2-GFP-FP        | ATGGATTCTTCTCCTCTTC             |
| DAR2-GFP-RP        | CAAAGGAAAAGTCCAGTTA             |
| TCP14-MYC-BamHI-LP | GGATCCTAATGCAAAAGCCAACATCAAG    |
| TCP14-MYC-Sac1-RP  | GAGCTCACTAATCTTGCTGATCCTCCTCAT  |
| TCP15-MYC-Kpn1-LP  | GGTACCCGATCCGGATCCGGATCAT       |
| TCP15-MYC-Sac1-RP  | GAGCTCATTAGGAATGATGACTGGTGCTTCC |
| TCP14-GFP-FP       | ATGCAAAAAGCCAACATCAAGTATCT      |
| TCP14-GFP-RP       | CTAATCTTGCTGATCCTCCTCATCA       |
| TCP15-GFP-FP       | ATGGATCCGGATCCGGATCAT           |
| TCP15-GFP-RP       | TTAGGAATGATGACTGGTGCTTCC        |

#### Primers for constructs in complementation test

|           |                                                        |
|-----------|--------------------------------------------------------|
| DA1CDS-F  | ATGGGTTGGTTTAAACAAGATCTT                               |
| DA1CDS-R  | AACCGGGAATCTACCGGTCA                                   |
| DAR1CDS-F | ATGGGTTGGCTAACTAAAAT                                   |
| DAR1CDS-R | AGGAAATGTACCGGTCAAGC                                   |
| DAR2CDS-F | ATGGATTCTTCTCCTCTT                                     |
| DAR2CDS-R | CAAAGGAAAAGTCCAGTT                                     |
| gDAR2-F   | GGGGACAAGTTTGTACAAAAAGCAGGCTACATTGGTTGATAAAGTCATAAAGTC |
| gDAR2-R   | GGGGACCACTTTGTACAAGAAAGCTGGGTCCAAAGGAAAAGTCCAGTTAAGCGG |

#### Primers for GUS constructs

|                        |                          |
|------------------------|--------------------------|
| DAR1 <sub>pro</sub> -F | GCACCTAAACAATAATTGATTGGC |
| DAR1 <sub>pro</sub> -R | TGGCAACAACAATCCCTTACC    |
| DAR2 <sub>pro</sub> -F | TTATGGACCGGATTAAGTCGG    |

---

---

DAR2pro-R GAGGATGGAAAAATGGCCCC

**Primers for qRT-PCR**

CYCA2;3-FP AGGCACAGATAACACAGCTG  
CYCA2;3-RP TGAGGTAGAGAGTGTGATGC  
RBR-FP AGTCGCTGCTGCTAAGACAAA  
RBR-RP ATGACAGTCCTGAGCCACTTGG  
TCP14-FP AAAGTAGACGGAAGAGGG  
TCP14-RP TACCAGGAAACAAAGACG  
TCP15-FP CCTCCTCTTCCACTTCCT  
TCP15-RP GTAGCCACTCAATAGTTCA  
ACTIN2-F GAAATCACAGCACTTGCACC  
ACTIN2-R AAGCCTTTGATCTTGAGAGC

---
